# Supplementary material for: Individual Differences in AMY1 Gene Copy Number, Salivary α-Amylase Levels, and the Perception of Oral Starch
Source: PLoS One. 2010 Oct 13;5(10):e13352. doi: 10.1371/journal.pone.0013352 (PMC2954178; doi:10.1371/journal.pone.0013352)
Supplement: File S1 — Raw data for MVAG, amylase and perceptual ratings. (0.14 MB XLS) [file pone.0013352.s001.xls]

## Sheet: MVAG
Table S1. MVAG Data for Fresh Saliva (n= 42)
Note: Data is normalized to 235 Brabender Units at 120 s
		Subject
		6	8	11	15	21	24	26	27	28	31	32	33	34	35	36	37	38	39	40	41	42	43	44	45	46	47	48	49	50	51	52	53	54	55	56	57	58	59	60	61	62	65
Minutes	Seconds
0.0833333	5	243	252	248	255	218	246	247	249	246	254	248	251	241	224	254	246	240	234	254	260	252	231	201	249	242	248	244	251	246	243	249	242	230	215	228	246	244	240	246	252	252	240
	10	243	251	248	254	218	245	247	248	245	252	247	249	240	223	254	245	238	234	252	259	250	232	204	248	242	247	244	249	246	243	249	242	231	216	228	246	242	239	245	251	250	240
	15	242	250	247	253	220	245	247	248	246	251	247	248	240	226	251	247	238	236	251	258	250	233	206	248	242	247	244	249	246	243	249	242	232	218	229	246	242	241	244	251	250	240
	20	242	250	247	252	232	245	247	248	246	251	247	247	240	226	254	247	240	236	251	257	250	234	208	248	242	247	244	249	246	243	248	242	233	219	230	246	242	240	243	251	250	240
	25	242	249	247	252	226	245	247	247	246	250	246	247	240	227	251	246	238	236	251	254	250	234	210	248	242	247	243	248	245	243	247	242	233	220	230	245	242	240	243	250	249	240
	30	242	249	246	250	227	245	246	246	245	249	246	246	240	228	250	246	239	237	250	253	249	234	213	247	242	246	243	247	244	243	247	242	233	221	231	245	242	240	243	249	249	240
	35	241	248	246	248	234	245	246	245	243	248	246	245	240	228	249	246	240	237	249	252	249	234	214	246	242	246	243	246	243	242	246	240	233	222	232	244	241	240	242	247	248	240
	40	241	247	246	246	237	245	245	244	241	246	246	245	240	228	247	246	242	237	247	251	248	234	216	244	242	245	242	245	241	241	244	239	233	223	233	243	241	240	242	246	247	240
	45	240	245	244	245	236	243	244	242	240	244	246	244	240	229	246	244	240	237	245	249	246	235	218	243	241	245	242	245	241	240	243	238	233	224	233	242	241	240	241	244	245	240
	50	238	244	243	243	232	242	242	241	239	243	246	243	240	229	245	242	240	236	244	247	244	235	219	241	239	243	241	242	240	240	242	238	233	225	233	241	239	239	241	243	243	239
	55	238	243	242	242	235	241	242	241	239	242	245	242	240	230	244	242	239	236	243	247	243	234	220	241	239	242	240	242	239	239	241	238	233	226	233	240	239	239	240	243	243	239
1	60	237	242	241	242	237	240	241	241	239	240	244	242	239	230	242	241	238	236	243	245	242	234	222	241	239	242	240	241	239	238	241	237	234	228	234	240	238	238	240	242	242	238
	65	237	241	240	240	236	240	240	240	239	241	241	241	239	230	242	240	237	236	242	245	241	234	222	240	238	241	239	240	239	238	240	237	234	228	234	239	238	237	239	241	241	237
	70	236	240	240	240	235	240	240	239	239	240	241	240	238	231	242	240	238	236	241	243	241	234	224	239	238	240	238	240	239	238	240	237	235	229	235	238	237	237	238	240	240	236
	75	236	240	239	240	234	239	240	239	239	239	240	239	238	232	239	240	240	236	241	242	240	234	227	239	238	240	237	239	238	237	239	237	235	230	235	238	237	237	238	240	240	236
	80	236	239	239	239	235	239	239	239	238	239	239	238	238	232	238	239	242	236	241	240	239	235	227	239	237	240	237	238	238	237	239	237	235	231	235	237	237	237	237	240	239	236
	85	236	238	238	238	237	238	238	239	237	238	239	238	237	233	238	238	242	236	240	240	239	235	228	238	237	239	237	238	237	237	238	236	235	232	235	237	237	236	237	239	238	236
	90	236	238	238	238	237	238	237	238	236	237	238	238	237	233	239	238	240	236	239	239	239	235	229	238	237	238	237	238	237	236	237	235	234	232	235	237	237	236	236	238	238	235
	95	236	238	237	237	235	238	237	237	236	238	237	237	237	233	237	238	243	236	238	238	238	234	231	237	237	238	236	237	237	236	237	235	234	232	235	236	237	236	236	237	238	235
	100	236	237	237	236	234	237	237	237	236	237	237	236	236	233	236	237	236	236	237	238	237	234	231	237	237	237	236	236	236	236	237	235	234	233	235	236	236	236	236	237	237	235
	105	236	236	237	235	236	237	236	237	236	237	237	236	236	234	236	237	235	236	237	237	236	235	232	237	236	237	235	236	236	236	237	235	235	234	235	235	236	235	236	237	236	235
	110	236	235	236	235	237	236	236	236	236	236	236	236	236	234	235	236	238	236	236	236	236	235	233	236	235	236	235	235	236	235	236	235	235	235	235	235	235	235	236	236	236	235
	115	235	235	235	235	237	236	235	236	235	235	235	235	236	235	235	236	236	236	236	236	235	235	234	236	235	235	235	235	235	235	235	235	235	235	235	235	235	235	235	235	236	235
2	120	235	235	235	235	235	235	235	235	235	235	235	235	235	235	235	235	235	235	235	235	235	235	235	235	235	235	235	235	235	235	235	235	235	235	235	235	235	235	235	235	235	235
	125	234	234	234	235	236	235	235	235	235	235	234	235	235	235	235	235	234	235	235	234	234	235	236	235	235	235	235	235	235	235	235	234	234	236	235	235	235	235	234	235	234	235
	130	234	233	234	233	237	233	234	234	234	234	234	233	235	229	235	235	231	235	235	233	233	234	236	234	235	234	236	234	235	234	235	235	232	234	233	235	234	234	234	235	232	233
	135	233	231	232	233	232	233	233	234	232	233	234	229	235	225	234	236	231	234	232	231	229	234	236	234	235	234	235	231	235	234	235	234	230	236	231	233	232	235	232	234	231	228
	140	231	229	230	232	232	228	230	234	231	232	233	226	234	222	234	236	232	233	231	231	228	234	237	233	234	235	234	231	235	234	233	232	228	234	230	231	231	232	231	233	229	224
	145	227	227	229	231	230	222	228	232	230	231	231	223	231	219	235	235	228	233	231	230	225	234	238	231	233	235	233	228	234	234	230	230	226	233	227	231	230	230	231	233	225	223
	150	226	224	225	228	229	221	226	209	227	230	232	221	229	215	235	234	228	232	229	228	224	234	238	230	233	234	231	225	234	233	229	229	223	233	226	230	227	229	231	230	220	219
	155	224	221	224	227	228	219	226	202	226	229	226	219	228	213	235	233	228	232	228	226	222	234	238	228	232	234	230	223	234	233	228	226	222	233	223	229	224	228	230	228	217	217
	160	222	219	224	226	224	217	224	182	225	228	225	216	227	212	235	233	228	231	227	225	222	234	238	227	231	234	228	219	234	233	226	225	221	232	221	228	223	226	229	227	215	212
	165	222	215	223	225	224	214	223	164	223	227	221	213	224	210	233	232	228	230	226	224	220	234	238	226	231	234	228	215	234	233	223	223	221	232	219	227	222	225	229	226	212	209
	170	220	213	222	224	223	212	221	153	223	225	218	211	222	208	233	231	226	229	225	222	219	234	239	225	230	234	227	212	233	233	222	222	220	232	216	226	220	224	228	225	209	205
	175	219	210	220	224	222	210	220	134	222	225	215	210	221	207	233	231	226	229	224	222	218	234	239	223	230	234	226	209	233	233	220	221	219	232	214	225	219	223	227	223	206	203
3	180	218	207	219	223	220	209	219	118	220	225	211	207	220	206	233	230	225	228	223	220	216	234	240	222	229	233	225	205	233	233	218	219	218	231	214	223	218	222	227	224	203	200
	185	217	206	218	222	220	207	217	108	220	223	209	205	219	205	233	229	225	228	222	219	215	234	240	221	229	233	223	203	233	233	216	218	216	231	214	223	218	221	227	223	202	197
	190	216	204	216	221	217	207	216	101	220	223	206	203	217	205	232	229	225	227	222	218	214	234	241	220	228	233	223	201	233	233	214	217	216	230	213	223	216	219	226	222	200	194
	195	215	203	216	220	216	205	215	94	219	223	206	201	215	205	232	228	224	227	222	217	213	234	241	219	228	233	221	198	233	233	212	216	215	229	210	222	216	218	226	221	198	192
	200	215	200	215	219	216	204	214	92	218	221	205	200	213	204	231	228	224	226	221	216	211	234	241	218	228	233	221	196	232	233	211	215	214	229	209	222	216	218	225	221	196	189
	205	215	199	213	219	215	203	212	90	217	221	202	198	213	202	233	228	224	226	220	215	211	234	241	218	227	232	220	195	232	233	210	215	214	229	207	221	216	218	225	220	194	187
	210	214	197	213	218	213	201	211	88	216	221	199	197	211	202	232	227	224	225	220	215	209	234	241	217	227	232	219	193	232	232	209	214	213	229	205	220	214	217	224	219	192	186
	215	213	196	212	219	214	199	209	85	215	221	196	196	209	200	232	227	224	225	219	214	208	234	241	216	226	232	219	191	232	233	208	214	212	229	205	220	214	217	224	219	190	184
	220	213	195	211	218	213	198	209	84	215	220	194	194	208	200	232	226	223	225	218	213	207	234	242	216	226	232	218	191	232	236	207	213	211	229	205	219	213	216	224	218	189	182
	225	211	193	211	217	213	196	207	83	214	219	192	193	206	199	232	226	224	224	217	212	206	234	243	215	225	232	217	189	232	236	206	212	211	228	203	219	213	216	224	217	187	180
	230	210	192	211	217	212	194	207	82	213	219	189	192	206	198	231	226	224	224	217	212	206	234	243	214	225	232	217	188	232	236	205	211	210	228	202	218	212	215	224	216	186	179
	235	210	191	210	217	213	193	205	81	213	218	188	191	204	197	230	225	224	223	217	211	205	234	243	213	225	232	217	186	232	236	205	211	209	227	200	219	211	214	223	217	184	176
4	240	209	191	209	216	212	192	205	80	213	218	185	189	203	196	230	225	224	223	217	211	204	234	243	213	225	232	216	186	232	236	205	210	209	227	199	217	211	214	223	216	184	175
	245	209	189	209	215	211	191	204	80	212	218	183	189	203	195	230	225	223	222	216	210	204	234	244	213	225	231	216	184	232	236	204	209	209	227	198	217	211	214	223	216	183	172
	250	208	189	209	215	212	190	203	77	211	218	181	187	202	195	230	224	223	222	216	210	203	234	244	213	225	231	215	184	232	236	203	209	209	227	197	217	210	213	223	215	182	171
	255	208	188	208	214	211	189	202	76	211	217	179	186	201	195	230	224	224	222	215	210	202	234	244	212	224	231	215	182	232	236	203	209	208	227	196	216	210	213	222	215	181	170
	260	207	187	207	214	212	188	202	76	211	216	177	186	200	194	229	225	224	222	215	209	202	234	243	211	224	231	214	182	232	236	202	209	208	227	195	216	209	212	222	214	180	168
	265	206	186	207	214	209	187	201	75	211	216	175	184	199	194	230	224	224	222	215	209	201	234	243	211	224	231	214	181	232	236	202	208	208	227	195	215	209	212	222	214	180	166
	270	205	186	206	213	210	186	200	73	210	216	174	184	199	193	230	224	224	222	215	208	201	234	244	211	224	231	214	180	232	236	202	208	207	227	193	215	209	211	222	214	178	165
	275	204	186	206	213	209	186	200	71	209	216	171	183	199	193	230	224	224	222	215	208	201	234	244	211	224	231	214	179	232	236	201	207	207	226	193	215	208	211	222	213	178	163
	280	203	184	206	212	207	184	200	71	209	216	169	182	198	193	230	224	224	222	214	208	200	234	244	210	224	231	213	178	232	236	200	207	207	226	192	215	208	211	222	212	177	162
	285	203	184	205	212	208	184	199	69	208	215	168	181	197	193	230	224	224	221	214	208	200	234	245	210	225	231	213	177	232	236	200	207	206	226	191	214	207	211	222	212	176	161
	290	203	183	204	212	206	184	199	69	208	215	166	180	196	192	230	224	224	221	214	208	199	234	245	209	225	231	212	177	232	236	200	206	205	226	190	214	207	210	222	212	175	159
	295	202	182	204	212	206	183	198	67	208	214	164	179	196	192	230	223	224	221	213	208	199	234	245	209	224	231	212	176	232	236	200	206	205	226	190	214	206	210	222	212	175	158
5	300	201	182	204	211	208	182	198	66	207	214	162	179	195	191	229	223	224	221	213	208	199	234	245	209	224	231	212	175	232	236	199	207	205	225	188	213	206	210	221	211	175	157
	305	201	181	204	211	206	182	198	65	206	214	160	178	194	191	230	223	225	221	213	208	199	234	245	209	224	231	212	175	232	236	199	205	204	225	188	213	206	209	221	211	174	156
	310	201	180	203	210	206	181	197	64	206	213	159	177	194	191	230	223	224	220	213	208	198	234	245	208	224	231	211	174	232	236	199	204	204	225	187	213	205	209	221	210	173	155
	315	200	179	203	210	206	181	197	64	206	214	157	177	194	191	230	222	224	220	213	207	198	234	245	208	223	231	211	173	232	236	198	204	203	225	187	213	205	209	221	210	173	154
	320	199	179	202	210	205	180	196	62	206	214	155	176	193	191	230	222	225	220	213	206	198	234	245	208	223	231	210	173	232	236	198	204	203	224	186	213	204	209	221	209	172	153
	325	199	178	202	210	206	179	196	62	205	213	154	176	192	190	229	222	224	220	213	206	197	234	245	207	223	231	210	172	232	236	198	203	202	224	185	213	204	208	220	209	171	152
	330	199	177	202	209	206	179	195	60	204	213	152	175	192	190	229	222	223	220	212	206	197	234	245	207	223	231	210	172	232	236	197	203	202	224	184	212	204	208	220	209	171	151
	335	198	177	202	209	205	179	195	59	204	212	150	175	192	189	230	221	224	220	212	205	197	234	245	206	223	231	209	171	232	236	198	202	201	224	184	212	204	207	220	209	170	150
	340	198	177	201	209	206	178	195	59	204	212	149	175	191	189	229	221	225	219	212	205	197	234	246	206	223	231	209	170	232	236	198	202	201	224	183	212	204	207	220	208	170	149
	345	197	176	201	208	205	177	195	58	204	211	148	174	191	189	229	221	224	219	212	205	197	234	246	206	223	231	209	170	232	236	197	202	200	224	183	211	203	207	220	208	169	149
	350	197	175	200	208	204	177	194	57	203	211	146	173	190	188	229	221	224	219	211	205	196	234	246	206	223	231	209	169	233	236	197	201	200	224	182	211	202	207	220	207	168	147
	355	196	175	200	207	204	177	194	56	202	211	145	172	189	188	228	221	224	219	211	205	196	234	246	205	223	231	208	169	233	236	196	202	200	224	181	211	202	206	220	207	168	147
6	360	196	174	199	207	203	177	193	55	202	211	143	172	189	188	228	221	224	218	211	205	195	234	246	205	222	231	208	168	233	236	196	202	200	224	181	210	202	206	220	207	168	146
	365	196	174	199	207	203	176	193	55	202	211	142	172	189	188	228	221	224	218	211	204	195	234	246	205	222	231	208	168	233	236	195	201	199	224	180	210	202	205	220	207	167	145
	370	196	173	199	207	203	176	193	53	201	211	140	171	188	187	228	221	224	218	210	204	195	234	246	204	222	231	207	167	233	236	197	201	198	223	179	210	201	205	220	206	166	144
	375	195	172	199	207	203	175	193	52	201	211	139	171	187	187	228	220	224	218	210	204	194	234	246	204	222	231	207	166	233	236	197	200	198	223	179	210	201	205	220	206	166	144
	380	195	172	199	206	202	175	192	52	201	211	137	170	187	187	228	220	224	218	210	203	194	234	246	204	222	231	207	165	233	237	196	200	198	223	178	210	200	204	220	205	166	142
	385	194	172	198	206	202	175	192	51	201	211	136	170	187	186	228	220	224	218	210	203	194	234	246	204	222	231	207	165	233	237	195	200	198	222	177	210	200	204	220	205	165	142
	390	194	171	198	205	202	174	192	50	200	211	135	170	187	186	228	220	224	218	210	203	194	234	246	204	221	231	207	167	233	236	195	200	197	222	177	210	199	204	219	205	165	141
	395	194	170	197	205	202	174	191	50	199	211	134	169	186	186	228	219	224	217	210	203	194	234	247	204	221	231	207	166	233	236	195	199	197	222	177	209	199	204	219	205	164	140
	400	193	170	197	205	203	173	191	49	199	211	132	168	185	186	228	219	224	217	210	203	194	234	247	203	221	231	206	165	233	236	195	198	196	222	176	209	199	203	219	205	163	140
	405	193	170	197	205	202	173	191	49	199	211	131	168	185	185	228	219	224	217	210	203	193	234	247	203	221	231	206	165	233	236	194	198	196	222	175	209	199	203	219	204	163	139
	410	192	169	197	205	202	172	191	48	199	211	129	168	185	185	228	219	224	216	210	203	193	234	246	203	221	231	206	165	233	237	194	197	195	222	174	209	198	202	219	204	163	138
	415	192	169	197	205	201	172	190	48	198	210	128	167	185	184	228	219	224	216	210	203	193	234	246	202	221	231	205	164	233	237	193	197	195	222	174	208	198	202	219	203	162	137
7	420	192	168	196	204	200	172	190	47	198	210	127	167	184	184	228	219	225	216	209	203	192	234	247	202	221	231	205	163	233	237	193	197	195	222	173	208	197	202	218	203	161	137
	425	192	168	196	204	200	171	190	46	197	210	126	166	183	184	228	219	225	216	209	202	192	234	246	204	221	231	205	163	233	237	193	197	195	222	173	208	197	202	218	202	161	136
		0
		5
		10
		15
		20
		25
		30
		35
		40
		45
		50
		55
		60
		65
		70
		75
		80
		85
		90
		95
		100
		105
		110
		115
		120
		125
		130
		135
		140
		145
		150
		155
		160
		165
		170
		175
		180
		185
		190
		195
		200
		205
		210
		215
		220
		225
		230
		235
		240
		245
		250
		255
		260
		265
		270
		275
		280
		285
		290
		295
		300
		305
		310
		315
		320
		325
		330
		335
		340
		345
		350
		355
		360
		365
		370
		375
		380
		385
		390
		395
		400
		405
		410
		415
		420
		425

## Sheet: Amylase
Table S2. Amylase Protein and AMY1 CNV Data
			Amylase Amount		Amylase Activity		AMY1 Copy Number (qPCR)
Subject	Sex	Flow Rate	Mg/ml	Mg/min	U/ml	U/min	Diploid AMY1 copies	SD	Copies (integer)
1	F	3.41417	0.889471	3.0368	34.112	116.464	5.2	0.385	5
2	F	1.70809	1.10688	1.89064	78.72	134.46	5.79	0.89	6
3	M	4.47756	4.12252	18.4588	98.728	442.06	5.87	0.32	6
4	M	1.83142	6.30542	11.5479	99.9307	183.016	10.98	1.12	11
5	F	1.84476	0.743758	1.37205	86.592	159.741	5.83	0.32	6
6	F	0.834667	2.77231	2.31395	88.1227	73.5531	6.19	0.255	6
7	F	1.11406	4.32769	4.82129	172.528	192.206	6.12	0.65	6
8	F	3.89067	3.69934	14.3929	131	509.677	3.94	0.125	4
9	F	3.10349	0.779563	2.41937	82.2187	255.165	3.48	0.12	3				AMY1 Copies	Count	Proportion
10	F	1.11339	0	0	6.77867	7.54729	1.38	0.035	1				1	2	0.0322581
11	F	4.67867	5.69207	26.6313	142.571	667.041	4.6	0.515	5				2	8	0.129032
12	F	1.604	1.05416	1.69087	96.6507	155.028	4.19	0.275	4				3	12	0.193548
13	F	1.82276	2.75108	5.01455	115.893	211.245	4.84	1	5				4	12	0.193548
14	M	2.7168	0.846952	2.301	77.408	210.302	3.49	0.32	3				5	12	0.193548
15	M	1.238	2.12484	2.63055	75.2213	93.124	3.03	0.155	3				6	10	0.16129
16	F	1.08272	0.243263	0.263386	98.6187	106.776	2.8	0.175	3				7	3	0.0483871
17	F	1.89076	0.518433	0.980232	114.363	216.232	4.46	0.305	4				8	1	0.016129
18	M	1.23806	0.160631	0.198872	124.859	154.583	4.54	0.28	5				9	0	0
19	M	1.07205	4.07739	4.37118	371	398.049	6.86	1.035	7				10	0	0
20	M	1.47274	1.08402	1.59647	134.043	197.41	3.96	0.31	4				11	2	0.0322581
21	M	1.366	3.27537	4.47416	84.4053	115.298	4.98	0.63	5
22	M	2.54546	1.28065	3.25984	55.9787	142.491	3.18	0.345	3
23	F	3.12149	3.42731	10.6983	77.408	241.628	2.72	0.215	3
24	M	1.228	5.00001	6.14001	216	265.248	5.95	0.545	6
25	F	0.524693	4.19091	2.19894	70.4107	36.944	4.21	0.6	4
26	F	1.62933	4.11224	6.70021	125.515	204.505	8.36	0.47	8
27	F	2.56946	6.70133	17.2188	350.523	900.655	10.63	1.23	11
28	F	2.09933	1.29641	2.72159	86.8107	182.245	2.47	0.195	2
29	F	2.26667	3.00269	6.80609	76.096	172.484
30	F	1.964	0.965978	1.89718	12.6827	24.9088	2.42	0.2	2
31	F	1.52933	2.71199	4.14753	129.451	197.973	4.34	0.305	4
32	F	0.764	2.8519	2.17886	97.3067	74.3423	1.94	0.185	2
33	F	2.37733	2.79284	6.63951	104.741	249.005	3.67	0.235	4
34	F	3.20067	3.31764	10.6187	81.5627	261.055	3.81	0.255	4
35	F	2.55467	3.83687	9.80192	75.2213	192.165	6.4	0.135	6
36	M	1.43467	0	0	4.37333	6.27428	1.11	0.02	1
37	M	5.97267	3.99651	23.8698	74.5653	445.354	3.73	0.295	4
38	F	1.2	2.91727	3.50072	52.2613	62.7136	3.32	0.235	3
39	M	0.341333	1.61607	0.551618	26.4587	9.03122	2.22	0.125	2
40	F	0.940667	4.5515	2.94094	122.235	114.982	3.65	0.3	4
41	M	1.20133	1.33171	1.59983	64.5067	77.494
42	M	2.83667	4.12371	11.6976	111.957	317.586	4.89	0.55	5
43	F	1.19867	0	0	1.312	1.57265	6.64	1.105	7
44	M	1.58667	0.288809	0.458244	33.6747	53.4305	4.3	0.28	4
45	F	1.118	2.44501	2.73352	103.648	115.878	3.42	0.035	3
46	M	1.16733	0.294109	0.343323	40.672	47.4778	3.05	0.285	3
47	M	0.831333	0.861109	0.715869	51.6053	42.9012	1.78	0	2
48	M	1.45267	2.11091	3.06645	103.429	150.248	3.02	0.01	3
49	M	0.706	2.57871	1.82057	127	89.8484	4.89	0.34	5
50	M	1.28333	0.081509	0.104603	14.2133	18.2404	2.19	0.03	2
51	F	0.357333	0	0	4.37333	1.56274	2.14	0.045	2
52	F	1.88933	2.84891	6.55676	104.085	196.652	7.03	0.82	7
53	M	1.148	3.92571	6.56806	103.429	118.737	4.52	0.19	5
54	F	0.631333	3.88981	1.69545	131.2	82.8309	3.27	0.38	3
55	F	0.348667	2.69451	0.939485	50.512	17.6119	2.2	0.12	2
56	M	1.63533	5.45011	8.91274	132.293	216.344	5.12	0.63	5
57	M	1.91	1.66051	3.17157	66.4747	126.967	5.1	0.27	5
58	M	0.359333	4.97011	1.78593	98.8373	35.5155	3.17	0.385	3
59	M	0.780667	2.83191	2.21078	95.12	74.257	4.04	0.405	4
60	F	2.292	1.62551	3.72567	45.92	105.249	5.72	2.14	6
61	M	3.08467	3.89051	12.0009	79.1573	244.174	4.6	0.22	5
62	F	0.748	0.720909	0.53924	39.36	29.4413	5.23	0.69	5
63	F	0.800667	1.33111	1.06577	46.1387	36.9417	5.67	0.375	6
64	F	2.29933	7.45521	17.142	114.363	262.958	5.53	0.525	6
65	M	3.706	6.7203	42.8385	179.744	666.131
External Subject Data Collection								n= 62	AMY1 Copies
								Median	4
66	F	2.66667	4.73567	12.6284	137.323	366.194		Mean	4.40323
67	F	0.78	3.55483	2.77277	91.7307	71.5499		SD	2.00376
68	F	4.37333	2.14075	9.3622	52.2613	228.556		Min	1
69	F	2.00667	1.99251	3.9983	67.896	136.245		Max	11
70	F	0.926667	2.63705	2.44366	70.9573	65.7538
71	F	0.533333	2.18631	1.16603	81.7813	43.6167
72	F	1.54667	2.774	4.29045	54.12	83.7056
73	F	3.82667	3.21835	12.3155	100.477	384.493
	n= 73	Flow Rate	Mg/ml	Mg/min	U/ml	U/min
	Median	1.54667	2.71199	2.94094	86.592	136.245
	Mean	1.83303	2.6372	5.65708	92.506	176.618
	SD	1.1549	1.80987	7.17147	61.5041	165.606
	Min	0.341333	0	0	1.312	1.56274
	Max	5.97267	7.45521	42.8385	371	900.655

## Sheet: Perceptual
Table S3. Perceptual Data for Starch, Water, and Xanthan Gum Stimuli (using Labeled Magnitude Scale)
	Starch Stimulus (n= 73)																					Water Stimulus (n= 65)																						Xanthan Gum Stimulus (n= 65)
	Time (s)																						Time (s)																						Time (s)
Subject	1	2	3	4	5	6	7	8	9	10	15	20	25	30	35	40	45	50	55	60		Subject	1	2	3	4	5	6	7	8	9	10	15	20	25	30	35	40	45	50	55	60		Subject	1	2	3	4	5
1	0	9.81	32.615	34.385	35.33	35.33	35.33	35.33	35.33	35.33	35.33	34.98	30.485	23.87	17.725	12.765	5.905	1.42	0.59	0.59		1	0	0	1.89	1.89	1.89	1.89	1.89	1.89	1.89	1.89	1.89	2.84	0.47	0	0	0	0	0	0	0		1	0	0	8.04	28.12	32.38
2	0	29.775	55.89	56.715	56.715	56.715	56.715	56.715	56.715	56.715	56.715	56.005	56.005	56.005	56.005	52.58	49.63	43.955	37.695	32.965		2	0	0	0	1.42	0	0	0	0	0	0	0	0	0	0	0	0	4.49	0	0	0		2	0	21.03	30.72	30.72	30.01
3	0	16.425	39.705	43.6	49.155	49.275	49.275	49.275	49.275	49.275	49.275	47.505	41.475	16.425	11.58	2.6	0	0	0	0		3	0	0	0	0	0	0	0	0	0	0	0	0	0	0	0	0	0	0	0	0		3	0	0.47	10.16	10.16	14.18
4	0	0	18.195	43.955	50.81	50.81	50.81	50.81	46.44	43.01	36.39	14.06	6.38	3.785	3.665	2.01	2.01	2.01	2.01	2.01		4	0	0	0	0	0	0	0	0	0	0	0	0	0.47	1.42	1.42	1.42	1.42	1.42	1.89	1.89		4	0	0	7.09	16.54	16.54
5	0	29.775	60.735	65.82	67.47	67.825	69.955	69.955	69.955	69.955	69.955	56.13	39.345	18.435	6.38	0	0	0	0	0		5	0	0	0	0	0	0	0	0	0	0	0	0	0	0	0	0	0	0	0	0		5	0	8.04	21.27	21.27	21.03
6	0	0	34.74	37.1	38.05	38.05	38.05	38.05	38.05	38.05	38.05	41.83	41.83	41.83	41.83	41.83	38.52	38.52	38.52	38.52		6	0	0	0	0	0	0.24	0.95	0.95	0.95	0.95	0.95	0.95	0.47	0.47	0.47	0.47	0.47	0.47	0.47	0.47		6	0	0	12.76	18.2	19.14
7	0	14.77	48.095	54.235	55.18	47.62	48.33	48.33	48.33	48.33	45.85	24.46	10.99	8.51	2.13	1.185	1.185	1.185	1.185	1.185		7	0	0	0.47	1.18	1.18	1.18	0.71	0.24	0.24	0.24	0.24	0.24	0.24	0.24	0.24	0.71	0	0	0	0		7	0	4.49	20.56	24.34	30.25
8	0	31.19	87.2	87.2	87.2	87.2	87.2	87.2	87.2	88.39	82.48	68.06	63.57	50.1	26	17.25	12.29	9.93	6.62	4.73		8	0	0	3.78	4.25	1.18	1.18	1.18	1.18	1.18	1.18	1.18	1.18	1.18	0	0	0	0	0	0	0		8	0	0	0	0	26.47
9	0	0	29.185	46.555	53.765	56.365	57.545	57.545	57.545	57.545	57.545	57.545	54.945	51.4	38.52	25.165	13.475	3.9	1.655	1.185		9	0	0	0	0	0	0	0	0	0	0	0	0	0	0	0	0	0	0	0	0		9	0	0	9.93	22.92	23.87
10	0	0	24.46	45.49	46.79	50.81	50.81	50.81	50.81	50.81	51.05	54.59	53.645	53.645	53.645	54.235	54.235	54.235	53.525	53.525		10	0	0	0	0	0	0	0	0	0	0	0	0.24	0.24	0.24	0.24	0.24	0.24	0.24	0.24	0.24		10	0	26.7	25.05	22.45	20.8
11	0	15.6	28.6	41.83	51.28	49.39	49.39	49.39	49.39	49.39	49.39	36.87	29.3	29.3	25.76	17.25	12.29	2.36	2.36	0		11	0	0	1.65	1.65	2.6	2.6	2.6	2.6	2.6	2.6	2.6	2.13	0	0	0	0	0	0	0	0		11	0	3.31	24.34	23.87	23.87
12	0	0.12	25.285	36.04	42.535	43.01	43.835	43.835	43.835	43.835	43.955	41.945	41	37.455	37.1	24.58	21.035	12.76	7.8	4.255		12	0	0	0	0.47	1.42	1.42	1.42	0	0	0	0	0	0	0	0	0	0	0	0	0		12	0	17.96	17.02	17.02	23.63
13	0	21.15	28.24	32.85	35.805	37.93	39.705	40.41	40.41	56.005	77.63	78.46	73.025	62.63	59.555	29.07	10.87	10.75	5.55	2.365		13	0	0	0.71	0.47	0.47	0.47	0.47	0.47	0	0	0	0	0	0	0	0	0	0	0	0		13	0	11.82	23.16	23.16	23.16
14	0	56.245	70.66	70.66	71.96	76.095	80.705	85.43	85.43	85.43	85.43	87.555	86.375	86.375	86.375	87.795	87.795	78.93	76.57	69.245		14	0	0	0	1.42	1.42	1.42	1.42	1.42	1.42	1.42	1.42	3.07	3.54	3.78	3.78	3.78	3.78	3.78	1.65	1.65		14	0	0	14.65	17.25	17.25
15	0	94.53	94.53	94.53	94.53	94.53	94.53	94.53	94.53	94.53	94.53	94.53	94.53	94.53	94.53	94.53	49.86	47.97	34.98	21.51		15	0	0	0	0	1.42	1.42	1.42	1.42	1.42	1.42	0	0	0	0	0	0	0	0	0	0		15	0	5.2	14.42	16.07	16.07
16	0	36.155	56.245	58.135	58.49	58.605	58.605	58.96	58.96	58.96	59.67	59.79	54.71	35.445	16.07	7.09	6.615	4.49	4.61	4.375		16	0	0	0	0.71	0.47	0.47	0.47	0.47	0.47	0.47	0.47	0.47	0.47	0.47	0.47	0.47	0.47	0.47	0.47	0.47		16	0	38.05	27.41	27.41	27.41
17	0	0	16.19	42.185	40.885	40.885	39.585	39.585	39.585	39.585	39.585	39.585	38.285	36.04	31.195	27.885	21.15	17.605	12.285	12.285		17	0	0	0	0	0	0	0	0	0	0	0	0	0	0	0	0	0	0	0	0		17	0	11.11	31.67	33.32	33.32
18	0	2.01	21.27	21.625	43.72	56.245	60.5	60.495	60.025	56.365	55.655	49.035	35.33	24.935	21.505	19.85	19.85	18.67	17.96	17.255		18	0	0	0	4.96	4.96	4.73	4.02	3.31	2.36	1.65	1.65	0.95	0.71	0.71	0.24	0.24	0.24	0.24	0.24	0.24		18	0	0	9.22	22.21	26.7
19	0	0	27.415	29.66	31.43	31.43	31.315	64.4	62.39	62.39	62.39	62.035	62.035	61.915	61.325	60.85	59.315	56.245	53.525	50.34		19	0	0	0	1	1	1	0	0	0	0	0	0	0	0	0	0	0	0	0	0		19	0	0.24	23.87	23.87	23.87
20	0	24.46	50.34	54.95	55.775	56.6	57.78	58.49	58.845	58.845	59.435	55.655	50.695	43.245	35.095	24.93	22.335	21.39	21.27	21.27		20	0	0	0	0	0	0	0	0	0	0	0	0	0	0	0	0	0	0	0	0		20	0	0	28.36	41.83	40.88
21	0	0	54.35	50.34	50.1	50.1	50.1	50.1	50.1	50.1	50.1	50.1	32.14	17.72	0.24	0.24	0.24	0.24	0.24	0.24		21	0	0	0	4.73	24.81	21.74	0	1.18	0.95	1.65	2.84	7.09	4.25	0.71	0.71	0.71	1.42	1.42	1.42	6.38		21	0	0	22.45	31.19	38.52
22	0	0.235	7.68	53.65	57.9	57.895	54.59	58.96	54.235	55.3	57.075	49.155	41	39.465	33.205	31.43	30.25	29.185	28.95	29.42		22	0	0	0.24	3.07	2.84	2.13	1.89	3.31	4.73	2.36	3.07	2.13	0.71	2.36	3.78	0.71	2.36	1.42	2.84	2.13		22	0	0	3.07	9.93	17.25
23	0	3.545	33.915	59.79	69.6	73.495	73.495	73.495	70.425	63.925	61.915	46.085	20.675	16.07	7.205	5.55	2.005	2.005	1.18	0.47		23	0	0	0	0.71	0.95	0.95	0.24	0	0	0	0	0	0	0	0	0	0	0	0.24	0.24		23	0	0	0	8.98	10.4
24	0	0	0	0	0	0	0	0	0	0	0	0	0	0	0	0	4.73	5.2	5.2	5.2		24	0	0	0	0	0	0	0	0	0	0	0	0	0	0	0	0	0	0	0.95	0.24		24	0	0	0	0	0
25	0	0	16.895	54.825	59.08	59.08	59.08	60.265	60.62	60.38	60.38	60.03	60.74	61.8	61.8	60.85	60.615	61.795	61.795	61.445		25	0	0	5.44	6.62	6.62	6.62	5.67	2.36	2.36	1.65	1.42	1.89	1.42	1.42	1.42	2.36	2.36	2.36	1.89	2.36		25	0	0	9.22	12.05	11.11
26	0	43.96	69.48	69.01	69.01	69.01	68.3	67.12	67.12	66.88	66.41	57.66	50.81	51.28	44.43	34.74	26.94	4.25	2.84	1.42		26	0	0	0	0	0	0	0	0	0	0	0	0	0	0	0	0	0	0.95	0.95	1.18		26	0	19.38	21.03	21.03	21.03
27	44.075	87.205	88.74	88.86	88.975	88.975	88.975	88.975	88.975	88.975	88.975	88.975	88.975	88.975	88.975	88.975	88.975	88.975	88.975	88.975		27	0	0	5.44	1.65	2.13	2.13	2.13	2.13	2.13	2.13	2.13	2.36	1.18	0.95	0.95	0.95	0.95	0.95	0.95	0.95		27	0	0	18.2	19.61	19.61
28	0	21.51	53.17	55.06	56.01	56.01	56.48	58.84	58.84	58.84	58.84	54.35	47.74	40.65	34.5	26.94	5.91	1.42	1.18	0.95		28	0	0	0	0.71	0.71	0	0	0	0	0	9.69	0.47	0	0	0	0	0	0	0	0		28	0	0	0	0	0
29	0	0	0	0	5.44	37.58	55.77	56.01	62.39	69.48	69.48	75.62	75.62	74.92	33.09	16.31	7.33	4.02	1.42	1.42		29	0	0	0	0	0	0	0.24	0.24	0.24	0.24	0.24	0	0.47	0.95	0.95	2.36	2.6	2.84	1.89	1.42		29	0	0	0	22.45	26.7
30	0	0	94.06	94.53	94.53	94.53	94.53	94.53	94.53	86.73	86.49	88.15	84.84	82	82	36.63	30.72	30.72	30.72	11.58		30	0	0	0	0	0.24	0	0.71	0.71	0.71	0.71	0	0	0	0	0	0	0	0	0	0		30	0	0	9.69	18.67	18.67
31	0	0	24.58	94.53	94.53	94.53	94.53	94.53	94.53	94.53	94.53	94.53	87.68	87.2	55.54	25.76	23.4	7.56	7.56	3.78		31	0	0	1.18	1.18	1.18	1.18	1.18	1.42	2.84	1.65	2.13	0	0	0	0	0	0	0	0	0		31	0	0	0	22.21	28.12
32	0	0	77.99	78.7	78.7	78.7	78.7	78.7	78.7	78.22	77.04	77.04	76.33	56.01	50.57	50.57	33.32	18.67	5.2	0		32	0	0	0	0	0	0	0	1.65	1.65	1.65	1.65	1.65	1.65	0.95	0	0	0	0	0	0		32	0	20.09	15.12	15.12	15.12
33	0	26	42.07	42.07	42.07	37.1	36.87	33.09	33.09	33.09	33.09	25.05	22.21	11.82	3.78	2.6	0	0	0	0		33	0	0.95	0.95	0	0	0	0	0	0	0	0	0	0	0	0	0	0	0	0	0		33	0	0	34.03	33.79	33.79
34	0	46.32	88.15	85.55	85.55	85.55	85.55	85.55	85.55	85.55	85.55	79.41	42.77	17.02	12.76	12.76	6.85	6.85	5.67	5.67		34	0	0	0.24	3.78	3.78	3.78	2.13	2.13	2.13	2.13	1.65	1.65	1.65	1.18	1.18	1.18	0.95	0.95	0.24	0.24		34	0	43.25	45.14	45.14	45.14
35	0	0	68.06	70.9	70.9	70.9	70.9	70.9	70.66	70.66	70.66	50.1	36.39	17.25	2.6	0	0	0	0	0		35	0	0	0	1.42	1.65	1.65	1.65	1.65	5.67	5.67	5.67	4.96	4.96	4.73	4.73	4.49	4.49	3.78	2.84	2.84		35	0	0	36.16	36.16	36.16
36	0	0	0	17.72	19.61	29.07	34.5	40.88	48.45	50.34	50.34	57.66	57.66	57.43	57.43	53.41	53.41	53.41	53.41	52.46		36	0	0	3.78	6.85	4.25	3.54	5.44	5.44	4.96	5.91	6.14	5.2	5.2	3.31	3.31	3.31	3.31	3.31	3.31	3.31		36	0	5.67	12.53	16.07	16.54
37	0	0	43.01	82	82	82	82	82	82	82	82	82	82	82	46.08	33.56	26	12.53	12.53	12.53		37	0	0	0	0	0	0	1.18	1.89	4.02	4.02	4.02	4.02	5.67	5.67	5.67	4.49	6.85	6.85	6.85	8.51		37	0	0.95	30.72	30.72	30.72
38	0	0	0	4.96	14.65	54.35	68.3	78.93	78.93	68.3	56.25	35.45	33.32	32.85	28.12	15.83	15.83	8.98	5.44	1.42		38	0	0	0	0	0	0	0	0	0	0	0	0	0	0	0	0	0	0	0	0		38	0	0	4.49	13	16.54
39	0	29.78	91.93	94.53	94.53	94.53	94.53	94.53	94.53	94.53	94.53	94.53	89.33	89.33	30.25	11.34	10.16	2.6	0.71	0		39	0	0	0.71	0.71	0.47	0.47	0.47	0.47	0.47	0.47	0.47	0.47	0	0	0	0	0	0	0	0		39	0	0	0	11.58	69.24
40	0	9.93	30.96	32.61	32.61	33.79	36.16	36.16	36.16	36.16	36.16	38.99	33.79	31.9	27.89	30.96	18.43	14.18	5.44	9.22		40	0	0.47	4.96	4.96	3.78	3.78	3.78	3.78	3.78	3.78	3.78	2.13	0.47	0.47	0.47	0	0	0	0	0		40	0	1.42	9.22	12.29	12.29
41	0	0	1.89	44.43	41.59	41.59	41.59	39.47	41.12	45.61	45.61	5.67	5.67	0	0	0	0	0	0	0		41	0	0	0	0	0	6	5.44	6.14	6.14	6.14	6.14	5.44	6.62	4.02	3.54	3.54	3.54	3.54	3.54	3.54		41	0	8.98	10.87	10.87	10.87
42	0	0	2.36	42.77	45.37	45.37	45.37	45.37	45.37	44.67	40.41	1.42	0	0	0	0	0	0	0	0		42	0	0	0	0	0	0	0	0	0	0	0	0	0	0	0	0	0	0	0	0		42	0	11.11	15.12	15.12	15.12
43	0	0	13	13.71	13.47	11.11	9.45	9.45	9.45	9.45	9.45	9.45	9.45	12.05	12.76	14.42	13.94	11.58	10.4	10.4		43	0	0	1.42	1.42	1.42	1.42	1.42	1.42	1.18	0.71	0.71	0.71	1.42	2.13	2.84	3.54	4.49	4.49	4.49	4.49		43	0	0	0	1.65	4.73
44	0	0	94.53	94.53	90.51	94.53	90.99	94.53	93.58	94.53	94.53	94.53	80.59	50.57	29.78	28.12	16.07	11.82	18.91	19.14		44	0	0	0	0	0	0	0	4.73	4.73	4.73	4.73	0	0	0	0	0	0	0	0	0		44	0	0	94.53	94.53	94.29
45	0	46.08	94.53	94.53	94.53	94.53	94.53	94.53	94.53	94.53	49.86	49.86	49.86	34.03	1.42	1.42	1.42	1.42	0	0		45	0	0	0	0	1.89	1.18	1.65	1.42	1.42	1.42	1.42	1.42	1.42	1.42	1.42	1.42	1.42	1.42	1.42	1.42		45	0	27.41	93.35	93.35	93.35
46	0	14.42	17.25	17.25	17.25	17.25	17.25	17.25	17.25	17.25	17.25	17.25	16.31	16.31	16.31	16.07	16.07	15.6	15.6	11.82		46	0	0	0	0	0	0.24	0	0.47	0.47	0.47	0.47	0.47	0.71	0.95	0.95	0.95	0.95	0.95	0.47	0.24		46	0	0	4.73	10.4	10.16
47	0	0	51.05	58.84	61.92	61.92	61.92	61.92	61.92	61.92	61.92	59.08	55.06	52.23	38.52	38.52	27.18	27.18	19.85	17.96		47	0	9.22	9	9.45	8.27	8.27	8.27	8.27	6.85	6.85	6.85	6.38	5.44	4.02	3.31	3.31	2.84	2.84	2.84	2.36		47	0	0	0	0	43.25
48	0	49.39	82.24	82.24	82.24	82.24	82.24	82.24	82.24	82.24	82.24	55.06	48.68	40.41	33.79	13.71	7.33	0.95	0	0		48	0	0	0	0	9.69	17.96	0.47	0.71	0.71	0.71	0.71	2.13	2.13	2.13	1.18	1.18	0.71	0.71	0.71	0.71		48	0	0.71	32.38	26	20.09
49	0	6.14	78.7	78.7	78.7	78.7	74.68	72.08	72.08	72.08	72.08	72.08	65.46	65.46	65.46	65.46	49.63	48.21	36.39	32.14		49	0	0	0	0	1.18	1.65	1.65	1.65	1.65	1.65	1.65	1.65	1.65	1.65	1.65	1.65	1.65	1.65	1.65	1.65		49	0	0	18.2	18.2	18.2
50	0	0	94.53	93.35	89.8	89.8	89.8	89.33	89.33	89.33	89.33	87.2	84.37	74.92	74.92	72.79	72.79	72.79	65.46	59.55		50	0	0	7.33	7.33	5.67	2.36	1.42	0.24	0	0.47	0.47	0.47	0.47	0.24	0.71	0.24	0.71	0.71	0.71	0.71		50	0	17.96	39.47	45.14	45.37
51	0	0	0	4.25	57.66	58.14	58.14	58.14	58.14	58.14	58.14	56.72	57.43	57.43	57.43	57.43	57.43	57.43	57.19	55.54		51	0	0	0	0	0	0	0	0	0.95	0.95	3.07	1.42	1.65	1.65	1.65	1.65	1.65	1.65	1.65	1.65		51	0	0	0	33.32	40.18
52	0	0	72.08	83.66	83.66	86.02	86.02	86.02	86.02	86.02	86.02	86.02	86.02	86.02	86.02	86.02	64.99	50.34	50.34	29.54		52	0	0	0	0	0	0	0	0	2.84	4.02	4.49	4.96	2.36	2.36	2.36	2.36	2.36	2.36	2.36	2.36		52	0	0	29.78	47.5	49.86
53	0	0	0	0	0	33.56	46.79	50.1	51.99	51.28	50.57	46.56	44.9	42.77	39.94	32.14	13.94	8.98	4.49	3.54		53	0	0	2.36	0	1.18	1.18	1.18	0.95	0.95	0.95	0.95	0.95	1.89	1.89	2.36	2.36	2.36	2.36	2.36	2.36		53	0	0	0	36.63	34.27
54	0	0	0	43.01	50.81	49.63	49.63	49.63	49.63	49.63	49.63	49.63	49.63	49.63	49.63	49.63	49.63	49.63	49.63	49.63		54	0	0	0	0	3.78	3.78	5.44	5.44	5.44	5.44	5.44	5.44	5.44	5.44	5.44	5.44	5.44	5.44	5.44	5.44		54	0	31.43	32.61	32.85	32.85
55	0	12.05	69.72	68.53	69.24	69.48	69.48	69.48	69.48	69.48	69.48	62.63	62.63	62.63	37.58	26.23	5.91	5.91	5.91	5.91		55	0	0	0	0	2.13	2.13	2.13	2.13	2.13	2.13	2.13	2.36	3.31	4.02	5.91	5.91	5.91	6.38	6.38	7.33		55	0	0	41.59	49.39	50.1
56	0	72.32	88.15	90.04	90.04	90.04	90.04	90.04	90.04	90.04	81.77	62.63	47.5	30.72	14.65	4.96	4.96	4.96	4.25	4.25		56	0	0	0	0.71	0.95	0.95	0.95	0.95	0.95	0.95	0.95	0.95	1.89	2.6	2.6	4.02	4.02	4.73	5.2	5.2		56	0	0	43.48	45.85	56.95
57	0	8.51	46.32	53.65	53.65	53.65	53.65	53.65	53.65	53.65	53.41	42.54	42.54	42.54	29.54	14.18	14.18	14.42	15.36	16.31		57	0	0	4.49	12.29	4.96	4.96	4.96	4.96	4.96	0	0.47	1.18	1.42	1.42	0	0	0	0	0	0		57	0	25.76	31.9	31.9	31.9
58	0	0	38.76	38.76	39.94	39.94	39.94	39.94	39.94	39.94	39.94	39.94	39.94	39.94	39.23	32.14	32.14	32.14	32.14	32.14		58	0	0	0	1.42	2.36	2.13	1.42	1.42	1.42	1.42	1.42	1.42	1.42	2.36	1.18	1.18	1.18	0.71	0.71	0.71		58	0	0	0	0	32.38
59	0	0	81.77	82.71	82.71	82.71	82.71	82.71	82.71	82.71	82.71	78.46	56.95	51.28	51.28	51.28	51.28	32.61	16.54	16.54		59	0	0	0	0	0	0	1.65	1.65	1.65	1.65	1.65	5.67	5.67	5.44	10.63	10.63	11.11	11.11	15.12	15.12		59	0	0	23.87	29.54	30.01
60	0	0	0	0	0	0	0	17.02	85.55	85.55	85.55	85.55	85.55	85.55	85.55	85.55	80.59	80.59	80.59	67.35		60	0	0	0	0	13.47	11.11	11.11	12.29	11.34	11.34	11.34	11.34	12.05	12.53	11.58	12.29	12.29	15.12	14.18	13.71		60	0	0	0	0	44.43
61	0	0	79.17	83.19	83.19	83.19	83.19	83.19	83.19	83.42	79.64	51.76	23.87	8.74	4.02	4.96	4.96	4.96	4.96	4.96		61	0	0	0	0	0	0	0	0	0	0	0	0	0	0	1.18	1.18	1.18	1.18	1.18	1.18		61	0	0	0	12.29	19.61
62	0	0	0	5.44	11.11	10.63	10.63	10.63	10.63	10.63	10.63	10.4	9.69	8.51	7.56	5.67	4.02	3.31	2.84	1.42		62	0	0	0.24	0.47	0.71	0.71	0.71	0.71	0.71	1.65	0.95	0.95	0.71	0.71	0.71	2.36	0.71	0.24	0.24	0.24		62	0	0	4.73	8.98	8.98
63	0	94.53	94.53	94.53	94.53	94.53	94.53	94.53	94.53	94.53	94.53	78.93	78.93	78.93	78.93	64.52	64.52	50.34	50.34	34.27		63	0	0	0	0	0	0	0	0	0	0	0	15.6	1.89	3.07	1.18	0	0.95	1.18	1.18	0.47		63	0	0	21.03	84.6	60.26
64	0	94.53	94.53	94.53	94.53	94.53	94.53	94.53	94.53	94.53	94.53	94.53	94.53	94.53	94.53	94.53	94.53	94.53	57.43	85.55		64	0	0	0	0	0	0	0	0	0	0	1.18	1.18	3.78	3.78	6.14	5.2	5.2	4.96	1.65	1.65		64	0	51.52	32.61	33.79	33.79
65	0	91.46	89.33	89.33	89.33	93.58	94.53	91.22	87.91	87.44	77.04	81.06	72.08	49.16	46.56	43.25	41.83	33.56	32.38	32.14		65	0	0	5.67	0	0	0	0	0	0	0	0	0	0	0.24	0	0	0	0	0	0		65	0	30.01	51.99	54.35	54.35
External Subject Data Collection (Starch only)
Subject	1	2	3	4	5	6	7	8	9	10	15	20	25	30	35	40	45	50	55	60
66	0	65	95	95	97	97	96	96	96	96	90	79	57	26	5	5	5	5	5	5
67	21	92	95	95	95	94	94	94	94	94	82	66	47	25	4	7	7	7	7	7
68	96	100	100	100	100	100	100	99	99	99	71	33	2	2	2	2	2	2	2	2
69	82	91	91	90	90	90	90	90	90	90	81	74	67	59	52	45	37	24	18	13
70	3	97	96	96	96	96	96	96	96	96	95	95	92	85	75	50	23	0	0	0
71	7	86	98	98	98	98	98	98	98	98	98	97	97	97	97	97	97	90	94	93
72	12	99	99	99	99	99	99	99	99	99	99	92	26	5	0	0	0	0	0	0
73	68	96	92	92	92	92	92	92	92	92	98	93	74	66	42	0	0	0	0	0
[truncated: 15 more columns]
